# Supplementary material for: Medial temporal lobe epilepsy is associated with neuronal fibre loss and paradoxical increase in structural connectivity of limbic structures
Source: PubMed Central journal article supplement — J Neurol Neurosurg Psychiatry. 2012 Jul 4;83(9):903–9. doi: 10.1136/jnnp-2012-302476 (PMC3415309; doi:10.1136/jnnp-2012-302476), 2012-07-04
Supplement: jnnp-2012-302476-s1.pdf [file jnnp-2012-302476-s1.pdf]

**Supplementary Table 1** summarizes the location of significant FA decrease in the white matter of patients (left and right MTLE combined, with the left MTLE grouped flipped along the y axis) compared with controls. The results are localized based on the overlying nearest gray matter AAL region.

| X   | Y   | Z   | Z score     | Region (AAL)                    |
|-----|-----|-----|-------------|---------------------------------|
| 36  | -8  | -14 | 4.461968422 | Hippocampus (ipsilateral)       |
| -32 | 32  | -6  | 4.315664291 | Frontal_Inf_Orb (contralateral) |
| -42 | -2  | 16  | 4.22136879  | Rolandic_Oper (contralateral)   |
| -18 | 24  | 6   | 4.005120277 | Caudate (contralateral)         |
| 48  | -48 | -4  | 3.996554613 | Temporal_Inf (ipsilateral)      |
| 28  | -92 | 10  | 3.973218679 | Occipital_Mid (ipsilateral)     |
| -34 | -12 | -16 | 3.95407033  | Hippocampus (contralateral)     |
| -16 | 24  | -12 | 3.879535675 | Rectus (contralateral)          |
| -12 | -76 | -4  | 3.743991375 | Lingual (contralateral)         |
| -48 | -4  | -18 | 3.737039328 | Temporal_Mid (contralateral)    |
| -42 | -2  | -28 | 3.736183882 | Temporal_Inf (contralateral)    |
| 44  | 26  | 6   | 3.726572037 | Frontal_Inf_Tri (ipsilateral)   |
| 34  | 0   | -34 | 3.715324163 | Fusiform (ipsilateral)          |
| 12  | -10 | 4   | 3.668783903 | Thalamus (ipsilateral)          |
| 28  | -20 | -8  | 3.624466896 | Hippocampus (ipsilateral)       |
| 46  | -24 | 22  | 3.623073339 | Rolandic_Oper (ipsilateral)     |
| -34 | -70 | 22  | 3.609212875 | Occipital_Mid (contralateral)   |
| 56  | -32 | -16 | 3.595876932 | Temporal_Inf (ipsilateral)      |
| -32 | 30  | 10  | 3.580302954 | Insula (contralateral)          |
| -32 | -2  | -32 | 3.553058386 | Fusiform (contralateral)        |
| -10 | -88 | 6   | 3.552999496 | Calcarine (contralateral)       |
| -24 | -30 | -4  | 3.439842939 | Hippocampus (contralateral)     |
| -16 | -54 | 16  | 3.431943655 | Precuneus (contralateral)       |
| 18  | -58 | 24  | 3.372729063 | Precuneus (ipsilateral)         |
| 34  | 28  | 12  | 3.367061853 | Frontal_Inf_Tri (ipsilateral)   |
| 40  | 2   | -34 | 3.354287624 | Temporal_Inf (ipsilateral)      |
| 10  | -90 | 22  | 3.323294878 | Cuneus (ipsilateral)            |
| 38  | -70 | 18  | 3.259498119 | Occipital_Mid (ipsilateral)     |
| -14 | 54  | -4  | 3.234737635 | Frontal_Med_Orb (contralateral) |
| -38 | 0   | -32 | 3.217200994 | Temporal_Inf (contralateral)    |
| -52 | 0   | 10  | 3.185965538 | Rolandic_Oper (contralateral)   |
| -20 | -28 | -4  | 3.168089151 | Hippocampus (contralateral)     |
| 46  | -56 | 14  | 3.138406754 | Temporal_Mid (ipsilateral)      |

Altered limbic connectivity in MTLE  
Supplementary Table

Bonilha et al

|     |     |     |             |                                |
|-----|-----|-----|-------------|--------------------------------|
| 42  | -60 | 24  | 3.097061634 | Angular (ipsilateral)          |
| 40  | 10  | 14  | 3.085606337 | Frontal_Inf_Oper (ipsilateral) |
| 34  | -12 | 18  | 3.079532146 | Insula (ipsilateral)           |
| 30  | -24 | -8  | 3.060530186 | Hippocampus (ipsilateral)      |
| 4   | -38 | 8   | 3.055024862 | Cingulum_Post (ipsilateral)    |
| 24  | -6  | -2  | 3.02495265  | Pallidum (ipsilateral)         |
| 30  | -72 | 18  | 3.024663448 | Occipital_Mid (ipsilateral)    |
| 46  | -40 | 12  | 3.022481441 | Temporal_Sup (ipsilateral)     |
| -10 | -50 | 18  | 3.009824276 | Precuneus (contralateral)      |
| 28  | -56 | 8   | 3.006223202 | Calcarine (ipsilateral)        |
| 42  | 38  | 10  | 2.989170313 | Frontal_Inf_Tri (ipsilateral)  |
| -32 | -66 | -6  | 2.988382578 | Fusiform (contralateral)       |
| -18 | -74 | -6  | 2.961104155 | Lingual (contralateral)        |
| -26 | -66 | 10  | 2.95533824  | Calcarine (contralateral)      |
| 60  | -8  | 24  | 2.949582577 | Postcentral (ipsilateral)      |
| -10 | -46 | 12  | 2.94955802  | Precuneus (contralateral)      |
| 42  | -6  | -34 | 2.9353652   | Temporal_Inf (ipsilateral)     |
| -42 | -8  | 22  | 2.924978256 | Rolandic_Oper (contralateral)  |
| 40  | -20 | 22  | 2.924792767 | Rolandic_Oper (ipsilateral)    |
| 44  | -70 | 24  | 2.911420822 | Temporal_Mid (ipsilateral)     |
| 42  | -2  | 18  | 2.904630899 | Rolandic_Oper (ipsilateral)    |
| 26  | 28  | -12 | 2.903612375 | Frontal_Inf_Orb (ipsilateral)  |
